# Supplementary material for: Identification of a Functional Connectome for Long-Term Fear Memory in Mice
Source: PubMed Central journal article supplement (PMC3536620; doi:10.1371/journal.pcbi.1002853), 2013-01-03
Supplement: pcbi.1002853.s016.pdf [file pcbi.1002853.s016.pdf]

| Region                                           | Abbreviation | #  | Region                                            | Abbreviation | #  |
|--------------------------------------------------|--------------|----|---------------------------------------------------|--------------|----|
| <b>Neocortex</b>                                 |              |    | <b>Thalamus (cont.)</b>                           |              |    |
| frontal association cortex                       | FrA          | 1  | ventral posteromedial thalamic nucleus            | VPM          | 45 |
| dorsolateral orbital cortex                      | DLO          | 2  | reticular thalamic nucleus                        | Rt           | 46 |
| lateral orbital cortex                           | LO           | 3  | zona inserta                                      | ZI           | 47 |
| ventral orbital cortex                           | VO           | 4  | medial geniculate nucleus, medial part            | MGM          | 48 |
| medial orbital cortex                            | MO           | 5  | <b>Hypothalamus</b>                               |              |    |
| infralimbic cortex                               | IL           | 6  | anterior hypothalamic area                        | AH           | 49 |
| prelimbic cortex                                 | PrL          | 7  | posterior hypothalamic area                       | PH           | 50 |
| cingulate cortex - anterior                      | Cg-a         | 8  | dorsomedial hypothalamic nucleus                  | DM           | 51 |
| cingulate cortex - posterior                     | Cg-p         | 9  | ventromedial hypothalamic nucleus                 | VMH          | 52 |
| retrosplenial granular cortex                    | RSG          | 10 | lateral hypothalamic area                         | LH           | 53 |
| ectorhinal cortex                                | Ect          | 11 | lateral preoptic area                             | LPO          | 54 |
| lateral entorhinal cortex                        | LEnt         | 12 | medial preoptic area                              | MPA          | 55 |
| lateral parietal association cortex              | LPtA         | 13 | septohypothalamic nucleus                         | SHy          | 56 |
| medial parietal association cortex               | MPtA         | 14 | lateral mammillary nucleus                        | LM           | 57 |
| perirhinal cortex                                | PRh          | 15 | retromammillary nucleus                           | RM           | 58 |
| temporal association cortex                      | TeA          | 16 | medial mammillary nucleus                         | MM           | 59 |
| secondary auditory cortex, ventral area          | AuV          | 17 | <b>Cerebral nuclei</b>                            |              |    |
| primary visual cortex                            | V1           | 18 | bed nucleus of the stria terminalis               | BST          | 60 |
| agranular insular cortex, posterior part         | AIP          | 19 | caudate putamen (striatum) - dorsal lateral       | Cpu-dl       | 61 |
| agranular insular cortex, dorsal part            | AID          | 20 | caudate putamen (striatum) - dorsal medial        | Cpu-dm       | 62 |
| agranular insular cortex, ventral part           | AIV          | 21 | accumbens nucleus, core                           | AcbC         | 63 |
| primary somatosensory cortex, barrel field       | S1BF         | 22 | accumbens nucleus, shell                          | AcbSh        | 64 |
| primary somatosensory cortex, dysgranular region | S1DZ         | 23 | ventral pallidum                                  | VP           | 65 |
| primary somatosensory cortex, forelimb region    | S1FL         | 24 | nucleus of the vertical limb of the diagonal band | VDB          | 66 |
| primary somatosensory cortex, hindlimb region    | S1HL         | 25 | claustrum                                         | Cl           | 67 |
| primary somatosensory cortex, jaw region         | S1J          | 26 | lateral amygdaloid nucleus                        | La           | 68 |
| primary somatosensory cortex, shoulder region    | S1Sh         | 27 | central amygdaloid nucleus                        | Ce           | 69 |
| primary somatosensory cortex, trunk region       | S1Tr         | 28 | basolateral amygdaloid nucleus                    | BL           | 70 |
| primary somatosensory cortex, upper lip region   | S1ULp        | 29 | medial septal nucleus                             | MS           | 71 |
| secondary somatosensory cortex                   | S2           | 30 | lateral septal nucleus, dorsal part               | LSD          | 72 |
| <b>Thalamus</b>                                  |              |    | lateral septal nucleus, intermediate part         | LSI          | 73 |
| anterodorsal thalamic nucleus                    | AD           | 31 | lateral septal nucleus, ventral part              | LSV          | 74 |
| anteromedial thalamic nucleus                    | AM           | 32 | <b>Hippocampus</b>                                |              |    |
| anteroventral thalamic nucleus                   | AV           | 33 | field CA1 of hippocampus - anterior               | CA1-a        | 75 |
| central thalamic nucleus                         | C            | 34 | field CA1 of hippocampus - medial                 | CA1-m        | 76 |
| habenular nucleus                                | Hb           | 35 | field CA1 of hippocampus - distal                 | CA1-d        | 77 |
| laterodorsal thalamic nucleus                    | LD           | 36 | field CA1 of hippocampus - posterior              | CA1-p        | 78 |
| lateral posterior thalamic nucleus               | LP           | 37 | field CA3 of hippocampus                          | CA3          | 79 |
| mediodorsal thalamic nucleus                     | MD           | 38 | dentate gyrus - upper blade                       | DG-up        | 80 |
| posterior thalamic nuclear group                 | Po           | 39 | dentate gyrus - lower blade                       | DG-low       | 81 |
| paraventricular thalamic nucleus                 | PV           | 40 | <b>Midbrain</b>                                   |              |    |
| reuniens thalamic nucleus                        | Re           | 41 | ventral tegmental area                            | VTA          | 82 |
| submedius thalamic nucleus                       | Sub          | 42 | periaqueductal gray                               | PAG          | 83 |
| ventrolateral thalamic nucleus                   | VL           | 43 | substantia nigra                                  | SN           | 84 |
| ventromedial thalamic nucleus                    | VM           | 44 |                                                   |              |    |
