# Supplementary material for: Identification of a Functional Connectome for Long-Term Fear Memory in Mice
Source: PubMed Central journal article supplement (PMC3536620; doi:10.1371/journal.pcbi.1002853), 2013-01-03
Supplement: pcbi.1002853.s017.pdf [file pcbi.1002853.s017.pdf]

| From        | To | Method              | Projection strength | Reference                  |
|-------------|----|---------------------|---------------------|----------------------------|
| AH          | Re | Fluorogold          | moderate            | (McKenna & Vertes 2004)    |
| AH          | Re | PHA-L               | exists              | (Risold et al. 1994)       |
| AH          | Re | Fluorogold          | exists              | (Risold & Swanson 1995)    |
| AH          | Re | Fluorogold          | exists              | (Risold & Swanson 1995)    |
| AH          | Re | PHA-L               | exists              | (Risold et al. 1997)       |
| AID         | Re | Fluorogold          | moderate            | (McKenna & Vertes 2004)    |
| AIP         | Re | HRP                 | light               | (Deacon et al. 1983)       |
| AIP         | Re | Fluorogold          | light               | (McKenna & Vertes 2004)    |
| AIV         | Re | Fluorogold          | light               | (McKenna & Vertes 2004)    |
| BL          | Re | PHA-L               | very light          | (Petrovich et al. 1996)    |
| BST         | Re | PHA-L               | exists              | (Dong & Swanson 2006a)     |
| BST         | Re | PHA-L               | exists              | (Dong & Swanson 2006b)     |
| BST         | Re | PHA-L               | light               | (Dong & Swanson 2006c)     |
| BST         | Re | PHA-L               | exists              | (Dong & Swanson 2004b)     |
| BST         | Re | PHA-L               | exists              | (Dong & Swanson 2004a)     |
| BST         | Re | PHA-L               | exists              | (Dong et al. 2001)         |
| BST         | Re | Fluorogold          | light               | (McKenna & Vertes 2004)    |
| CA1         | Re | PHA-L               | very light          | (Cenquizca & Swanson 2006) |
| CA1         | Re | PHA-L               | very light          | (Cenquizca & Swanson 2006) |
| CA1         | Re | PHA-L               | very light          | (Cenquizca & Swanson 2006) |
| Cg-a        | Re | autoradiography     | light               | (Beckstead 1979)           |
| Cg-a        | Re | HRP/WGA             | light               | (Finch et al. 1984)        |
| Cg-a        | Re | Fluorogold          | moderate            | (McKenna & Vertes 2004)    |
| Cg-a        | Re | PHA-L               | exists              | (Risold et al. 1997)       |
| Cl          | Re | Fluorogold          | strong              | (McKenna & Vertes 2004)    |
| Cl          | Re | PHA-L               | exists              | (Risold et al. 1997)       |
| DM          | Re | Fluorogold          | light               | (McKenna & Vertes 2004)    |
| DM          | Re | Fluorogold          | exists              | (Risold & Swanson 1995)    |
| DM          | Re | PHA-L               | exists              | (Thompson et al. 1996)     |
| Ect         | Re | HRP                 | moderate            | (Deacon et al. 1983)       |
| Ect         | Re | Fluorogold          | light               | (McKenna & Vertes 2004)    |
| Hb          | Re | Fluorogold          | moderate            | (McKenna & Vertes 2004)    |
| Hippocampus | Re | fluorescent tracers | exists              | (Woolf et al. 1984)        |
| IL          | Re | fluorescent tracers | moderate            | (Freedman & Cassell 1991)  |
| IL          | Re | Fluorogold          | strong              | (McKenna & Vertes 2004)    |
| IL          | Re | PHA-L               | exists              | (Risold et al. 1997)       |
| LH          | Re | PHA-L               | light               | (Allen & Cechetto 1993)    |
| LH          | Re | PHA-L               | light/moderate      | (Goto et al. 2005)         |
| LH          | Re | Fluorogold          | strong              | (McKenna & Vertes 2004)    |
| LH          | Re | PHA-L               | exists              | (Risold et al. 1994)       |
| LH          | Re | Fluorogold          | exists              | (Risold & Swanson 1995)    |

|     |    |                     |          |                               |
|-----|----|---------------------|----------|-------------------------------|
| LM  | Re | Fluorogold          | moderate | (McKenna & Vertes 2004)       |
| LPO | Re | PHA-L               | exists   | (Risold et al. 1997)          |
| LS  | Re | Fluorogold          | moderate | (McKenna & Vertes 2004)       |
| LSV | Re | PHA-L               | exists   | (Risold & Swanson 1997)       |
| MM  | Re | PHA-L               | exists   | (Canteras & Swanson 1992)     |
| MM  | Re | Fluorogold          | light    | (McKenna & Vertes 2004)       |
| MO  | Re | Fluorogold          | strong   | (McKenna & Vertes 2004)       |
| MPO | Re | PHA-L               | exists   | (Simerly & Swanson 1988)      |
| PAG | Re | Fluorogold          | moderate | (McKenna & Vertes 2004)       |
| PAG | Re | PHA-L               | exists   | (Risold et al. 1997)          |
| PH  | Re | Fluorogold          | strong   | (McKenna & Vertes 2004)       |
| PH  | Re | Fluorogold          | exists   | (Risold & Swanson 1995)       |
| PH  | Re | PHA-L               | exists   | (Risold et al. 1997)          |
| PrH | Re | HRP                 | moderate | (Deacon et al. 1983)          |
| PrH | Re | Fluorogold          | light    | (McKenna & Vertes 2004)       |
| PrH | Re | PHA-L               | exists   | (Risold et al. 1997)          |
| PrL | Re | autoradiography     | light    | (Beckstead 1979)              |
| PrL | Re | PHA-L               | exists   | (Hurley et al. 1991)          |
| PrL | Re | Fluorogold          | strong   | (McKenna & Vertes 2004)       |
| PrL | Re | PHA-L               | exists   | (Risold et al. 1997)          |
| PrL | Re | PHA-L               | moderate | (Sesack et al. 1989)          |
| PrL | Re | HRP/WGA             | light    | (Zeng & Stuesse 1991)         |
| PV  | Re | Fluorogold          | exists   | (Risold & Swanson 1995)       |
| PV  | Re | PHA-L               | exists   | (Thompson & Swanson 2003)     |
| RSG | Re | HRP/WGA             | light    | (Finch et al. 1984)           |
| RSG | Re | Fluorogold          | moderate | (McKenna & Vertes 2004)       |
| RSG | Re | PHA-L               | exists   | (Risold & Swanson 1995)       |
| RSG | Re | fluorescent tracers | moderate | (Sripanidkulchai & Wyss 1986) |
| RSG | Re | HRP                 | light    | (Thompson & Robertson 1987)   |
| RSG | Re | fluorescent tracers | light    | (van Groen & Wyss 1990)       |
| RSG | Re | PHA-L               | light    | (van Groen & Wyss 1990)       |
| Rt  | Re | Fluorogold          | light    | (McKenna & Vertes 2004)       |
| Rt  | Re | PHA-L               | exists   | (Risold et al. 1997)          |
| S1  | Re | Fluorogold          | light    | (McKenna & Vertes 2004)       |
| S2  | Re | Fluorogold          | light    | (McKenna & Vertes 2004)       |
| TeA | Re | HRP/WGA             | exists   | (Arnault & Roger 1990)        |
| V1  | Re | fluorescent tracers | light    | (Dreher et al. 1990)          |
| VMH | Re | PHA-L               | exists   | (Canteras et al. 1994)        |
| VMH | Re | Fluorogold          | moderate | (McKenna & Vertes 2004)       |
| VMH | Re | Fluorogold          | exists   | (Risold & Swanson 1995)       |
| VTA | Re | autoradiography     | light    | (Beckstead et al. 1979)       |
| VTA | Re | Fluorogold          | moderate | (McKenna & Vertes 2004)       |

|    |             |            |          |                         |
|----|-------------|------------|----------|-------------------------|
| ZI | Re          | Fluorogold | strong   | (McKenna & Vertes 2004) |
| ZI | Re          | PHA-L      | exists   | (Risold et al. 1997)    |
| Re | Acb         | PHA-L      | exists   | (Risold et al. 1997)    |
| Re | AcbC        | PHA-L      | light    | (Vertes et al. 2006)    |
| Re | AcbS        | PHA-L      | light    | (Vertes et al. 2006)    |
| Re | AID         | PHA-L      | moderate | (Vertes et al. 2006)    |
| Re | AIP         | PHA-L      | light    | (Vertes et al. 2006)    |
| Re | AIV         | PHA-L      | moderate | (Vertes et al. 2006)    |
| Re | AM          | PHA-L      | light    | (Vertes et al. 2006)    |
| Re | AM          | PHA-L      | light    | (Vertes et al. 2006)    |
| Re | AV          | PHA-L      | light    | (Vertes et al. 2006)    |
| Re | BL          | PHA-L      | light    | (Vertes et al. 2006)    |
| Re | BST         | PHA-L      | light    | (Vertes et al. 2006)    |
| Re | BST         | PHA-L      | exists   | (Risold et al. 1997)    |
| Re | BST         | CTB        | light    | (Shin et al. 2008)      |
| Re | BST         | CTB        | light    | (Shin et al. 2008)      |
| Re | C           | PHA-L      | light    | (Vertes et al. 2006)    |
| Re | CA1         | PHA-L      | exists   | (Risold & Swanson 1995) |
| Re | CA1         | PHA-L      | exists   | (Risold et al. 1997)    |
| Re | CA1         | PHA-L      | strong   | (Vertes et al. 2006)    |
| Re | Cg-a        | HRP/WGA    | light    | (Hurley et al. 1991)    |
| Re | Cg-a        | PHA-L      | exists   | (Risold & Swanson 1995) |
| Re | Cg-a        | PHA-L      | strong   | (Risold et al. 1997)    |
| Re | Cg-a        | PHA-L      | moderate | (Vertes et al. 2006)    |
| Re | Cl          | HRP/WGA    | moderate | (Hurley et al. 1991)    |
| Re | Cl          | PHA-L      | strong   | (Vertes et al. 2006)    |
| Re | Cpu         | PHA-L      | light    | (Vertes et al. 2006)    |
| Re | Ent-l       | PHA-L      | exists   | (Risold & Swanson 1995) |
| Re | Ent-l       | PHA-L      | exists   | (Risold et al. 1997)    |
| Re | Ent-m       | PHA-L      | exists   | (Risold & Swanson 1995) |
| Re | Ent-m       | PHA-L      | strong   | (Risold et al. 1997)    |
| Re | FrA         | PHA-L      | light    | (Vertes et al. 2006)    |
| Re | Hb          | PHA-L      | light    | (Vertes et al. 2006)    |
| Re | Hippocampus | HRP        | exists   | (Wyss et al. 1979)      |
| Re | IL          | PHA-L      | exists   | (Risold & Swanson 1995) |
| Re | IL          | PHA-L      | strong   | (Vertes et al. 2006)    |
| Re | LA          | PHA-L      | exists   | (Risold et al. 1997)    |
| Re | LA          | PHA-L      | light    | (Vertes et al. 2006)    |
| Re | LEnt        | PHA-L      | strong   | (Vertes et al. 2006)    |
| Re | LO          | PHA-L      | moderate | (Vertes et al. 2006)    |
| Re | LS          | PHA-L      | exists   | (Risold et al. 1997)    |
| Re | LSI         | PHA-L      | light    | (Vertes et al. 2006)    |

---

|    |     |            |        |                         |
|----|-----|------------|--------|-------------------------|
| Re | LSV | Fluorogold | exists | (Risold & Swanson 1997) |
| Re | LSV | PHA-L      | light  | (Vertes et al. 2006)    |
| Re | MD  | PHA-L      | light  | (Vertes et al. 2006)    |
| Re | MM  | PHA-L      | light  | (Vertes et al. 2006)    |
| Re | MO  | PHA-L      | strong | (Vertes et al. 2006)    |
| Re | MS  | PHA-L      | light  | (Vertes et al. 2006)    |
| Re | PL  | PHA-L      | strong | (Risold et al. 1997)    |
| Re | PRh | PHA-L      | exists | (Risold & Swanson 1995) |
| Re | PrH | PHA-L      | strong | (Vertes et al. 2006)    |
| Re | PrL | HRP/WGA    | light  | (Hurley et al. 1991)    |
| Re | PrL | PHA-L      | exists | (Risold & Swanson 1995) |
| Re | PrL | PHA-L      | strong | (Vertes et al. 2006)    |
| Re | PrL | HRP/WGA    | exists | (Zeng & Stuesse 1991)   |
| Re | PV  | PHA-L      | light  | (Vertes et al. 2006)    |
| Re | RSG | PHA-L      | strong | (Vertes et al. 2006)    |
| Re | RSG | Fluorogold | exists | (Risold & Swanson 1995) |
| Re | RSG | PHA-L      | exists | (Risold & Swanson 1995) |
| Re | Rt  | PHA-L      | light  | (Vertes et al. 2006)    |
| Re | S1  | PHA-L      | light  | (Vertes et al. 2006)    |
| Re | S2  | PHA-L      | light  | (Vertes et al. 2006)    |
| Re | Sub | PHA-L      | light  | (Vertes et al. 2006)    |
| Re | TeA | PHA-L      | light  | (Vertes et al. 2006)    |
| Re | VDB | PHA-L      | light  | (Vertes et al. 2006)    |
| Re | VL  | PHA-L      | light  | (Vertes et al. 2006)    |
| Re | VLO | PHA-L      | light  | (Vertes et al. 2006)    |
| Re | VO  | PHA-L      | strong | (Vertes et al. 2006)    |
| Re | VO  | PHA-L      | exists | (Risold et al. 1997)    |
| Re | ZI  | PHA-L      | light  | (Vertes et al. 2006)    |

---
