# Supplementary material for: Identification of a Functional Connectome for Long-Term Fear Memory in Mice
Source: PubMed Central journal article supplement (PMC3536620; doi:10.1371/journal.pcbi.1002853), 2013-01-03
Supplement: pcbi.1002853.s018.pdf [file pcbi.1002853.s018.pdf]

|                                     | 1 day | 36 days | Difference [95% CI] |                        |
|-------------------------------------|-------|---------|---------------------|------------------------|
| interneocortical                    | 0.127 | 0.551   | 0.424               | <b>[0.0005 0.6856]</b> |
| intersomatosensory                  | 0.279 | 0.752   | 0.473               | <b>[0.0499 0.7903]</b> |
| mPFC-neocortex,thalamus,hippocampus | 0.312 | 0.603   | 0.292               | <b>[0.0069 0.5782]</b> |
| mPFC-neocortex                      | 0.268 | 0.669   | 0.401               | <b>[0.0186 0.6481]</b> |
| mPFC-thalamus                       | 0.432 | 0.551   | 0.118               | [-0.2104 0.4889]       |
| mPFC-hypothalamus                   | 0.192 | 0.276   | 0.084               | [-0.4080 0.4947]       |
| mPFC-cerebral nuclei                | 0.285 | 0.501   | 0.216               | [-0.0610 0.4608]       |
| mPFC-hippocampus                    | 0.325 | 0.575   | 0.250               | [-0.0807 0.7248]       |
| mPFC-midbrain                       | 0.395 | 0.561   | 0.166               | [-0.6172 0.7352]       |
| hippocampus-neocortex               | 0.142 | 0.452   | 0.310               | <b>[0.0037 0.5432]</b> |
| hippocampus-thalamus                | 0.305 | 0.373   | 0.068               | [-0.1321 0.2799]       |
| hippocampus-hypothalamus            | 0.127 | 0.098   | -0.030              | [-0.2932 0.1883]       |
| hippocampus-cerebral nuclei         | 0.208 | 0.335   | 0.126               | [-0.1153 0.3788]       |
| hippocampus-hippocampus             | 0.303 | 0.448   | 0.144               | [-0.1816 0.4183]       |
| hippocampus-midbrain                | 0.458 | 0.372   | -0.085              | [-0.5344 0.1539]       |
