# Supplementary material for: Identification of a Functional Connectome for Long-Term Fear Memory in Mice
Source: PubMed Central journal article supplement (PMC3536620; doi:10.1371/journal.pcbi.1002853), 2013-01-03
Supplement: pcbi.1002853.s020.pdf [file pcbi.1002853.s020.pdf]

| Region (s)                     | Manipulation               | Behaviour                              | Reference                 | Retention delay (days) |
|--------------------------------|----------------------------|----------------------------------------|---------------------------|------------------------|
| Cg-a                           | inactivation               | context fear conditioning              | Frankland et al., 2004    | 36                     |
| Cg-a                           | inactivation               | spatial memory (morris water maze)     | Teixeira et al., 2006     | 30                     |
| Cg-a                           | inactivation               | spatial memory (5 arm maze)            | Maviel et al., 2004       | 30                     |
| Cg-a                           | inhibition of spine growth | context fear conditioning              | Vetere et al., 2011       | 42                     |
| Cg-a                           | DNMT inhibition            | context fear conditioning              | Miller et al., 2010       | 30                     |
| mPFC (PrL & IL)                | inactivation               | trace fear conditioning                | Blum et al., 2006         | 30                     |
| mPFC (PrL & IL)                | inactivation               | spatial memory (5 arm maze)            | Maviel et al., 2004       | 30                     |
| mPFC (PrL & IL)                | lesions                    | trace classical eyeblink conditioning  | Takehara et al., 2003     | 32                     |
| mPFC (PrL & IL)                | lesions                    | trace fear conditioning                | Quinn et al., 2008        | 212                    |
| ILN/LT (LD, MD & C)            | lesions                    | spatial memory (morris water maze)     | Lopez et al., 2009        | 25                     |
| RSG                            | lesions                    | place discrimination (radial maze)     | Haijima & Ichitani, 2008  | 35                     |
| RSG                            | inactivation               | context fear conditioning              | Corcoran et al., 2011     | 36                     |
| PRh                            | lesions                    | context fear conditioning              | Burwell et al., 2004      | >42                    |
| BL                             | lesions                    | context fear conditioning              | Gale et al., 2004         | 502                    |
| Ce                             | lesions                    | fear-potentiated startle               | Kim & Davis, 1993         | 37                     |
| OFC (MO, VO, LO, DLO)          | inactivation               | social transmission of food preference | Lesburguères et al., 2011 | 30                     |
| hippocampus <sup>a</sup>       | inactivation               | spatial memory (morris water maze)     | Broadbent et al., 2006    | 30                     |
| hippocampus <sup>a, c</sup>    | lesions                    | context fear conditioning              | Lehmann et al., 2007      | >104                   |
| hippocampus <sup>a, b, c</sup> | lesions                    | context fear conditioning              | Sutherland et al., 2008   | 100                    |
| hippocampus <sup>c</sup>       | lesions                    | fear potentiated startle               | Lehmann et al., 2010      | 42                     |
| hippocampus <sup>a, b, c</sup> | lesions                    | morris water maze                      | Martin et al., 2005       | 56                     |
| hippocampus <sup>c</sup>       | lesions                    | object fear conditioning               | Lehmann et al., 2006      | 28                     |
| hippocampus <sup>c</sup>       | lesions                    | picture discrimination                 | Epp et al., 2008          | >37                    |
| hippocampus <sup>c</sup>       | lesions                    | spatial memory (cross maze)            | Winocur et al., 2005      | >28                    |
| hippocampus <sup>a, c</sup>    | lesions                    | spatial memory (water and land maze)   | Clark et al., 2005        | >77                    |
| hippocampus <sup>a</sup>       | lesions                    | spatial reference memory (radial maze) | Ramos, 2009               | 82                     |
| hippocampus <sup>c</sup>       | lesions                    | water maze (early life training)       | Clark et al., 2005        | 114                    |
| hippocampus <sup>c</sup>       | lesions                    | water maze (modified)                  | Clark et al., 2007        | 74                     |
| hippocampus <sup>a</sup>       | lesions                    | place discrim (radial maze)            | Haijima & Ichitani, 2008  | 35                     |
